# Supplementary material for: Preparation of high-performance monoazo disperse dyes bearing ester groups based on benzisothiazole and their dyeing performance on polyester fabrics
Source: Royal Society of Chemistry journal article supplement (doi:10.1039/d3ra06452b), 2024-01-01
Supplement: d3ra06452b1.pdf [file d3ra06452b1.pdf]

---

Supporting information

**Preparation of High Performance Monoazo Disperse Dyes Bearing  
Ester Group Based on Benzisothiazole and Their Dyeing  
Performance on Polyester Fabrics**

Xiyu Song,<sup>\*a,b</sup> Chuang Dai <sup>a</sup>, Mingda Li, <sup>a</sup> Min Li, <sup>c</sup> Liu Hu, <sup>d</sup> Yu Wang, <sup>a</sup> Aiqin Hou, <sup>b</sup> Hongfei Qian <sup>a</sup>

a. *Key Laboratory of Clean Dyeing and Finishing Technology of Zhejiang Province, Shaoxing*

*University, Shaoxing 312000, P R China*

b. *College of Chemistry and Chemical Engineering, Donghua University, Shanghai 201620, P R*

*China*

c. *College of Textile and Garment, Nantong University, Nantong 226019, P R China*

d. *Engineering Research Center for Eco-Dyeing and Finishing of Textiles Ministry of Education,*

*Zhejiang Sci-Tech University, Hangzhou 310018, P R China*

*\* Corresponding author. E-mail address: xiyusong@usx.edu.cn (Xiyu Song)*

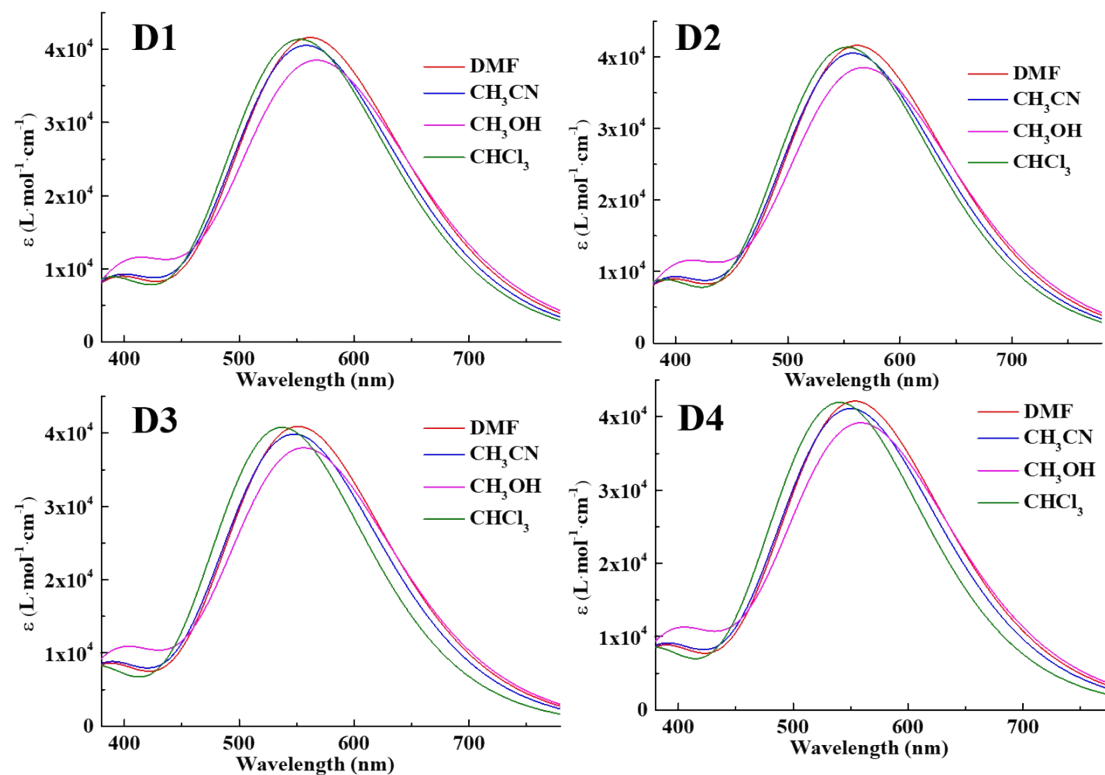

Fig. S1. Simulated absorption spectrum at PBE0/TZVP level in different solvents for D1-D4

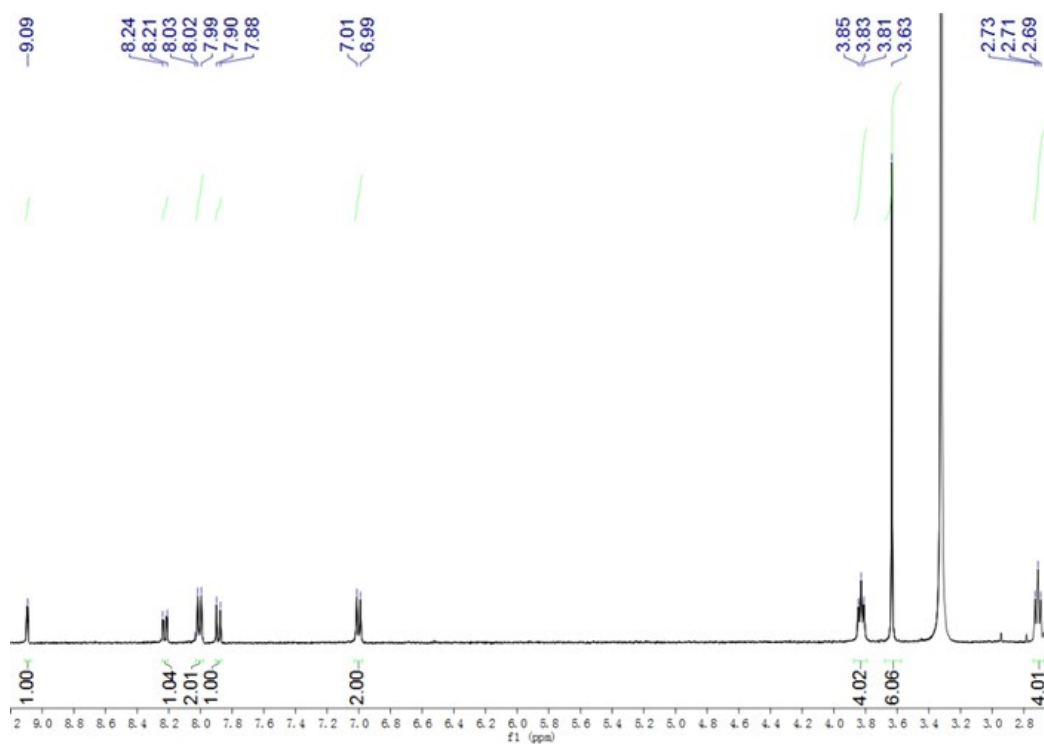

Fig. S2.  $^1\text{H}$ -NMR spectrum of D1

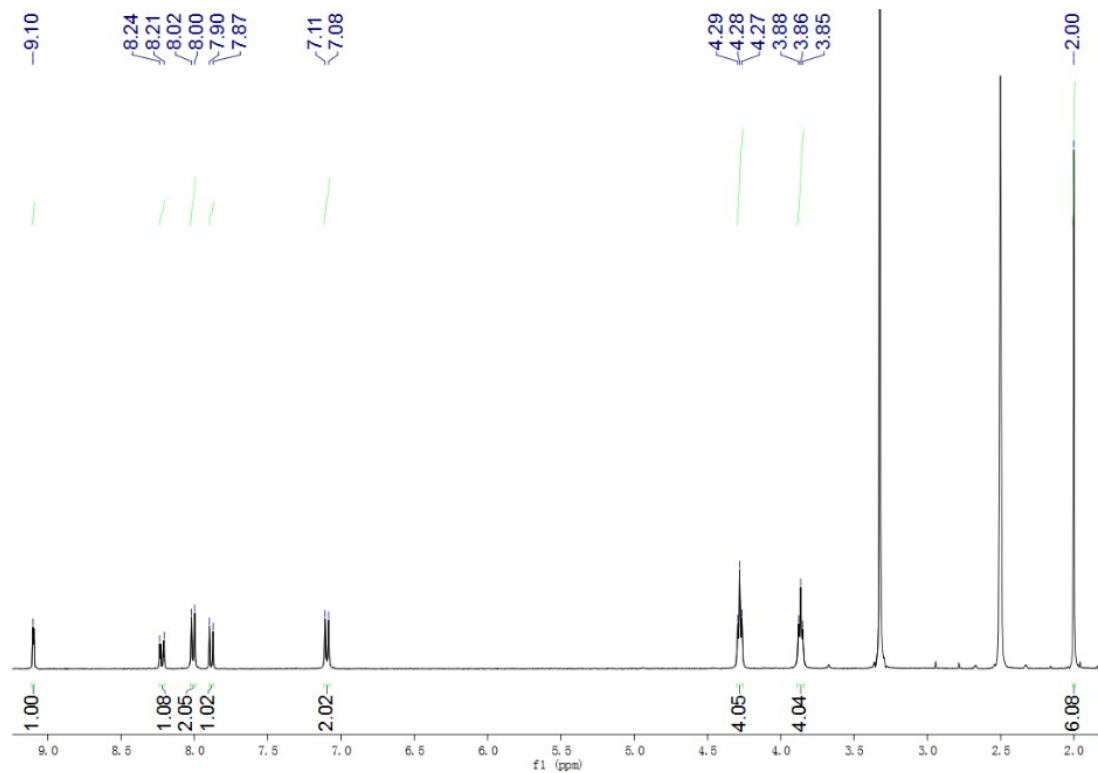Fig. S3. <sup>1</sup>H-NMR spectrum of D2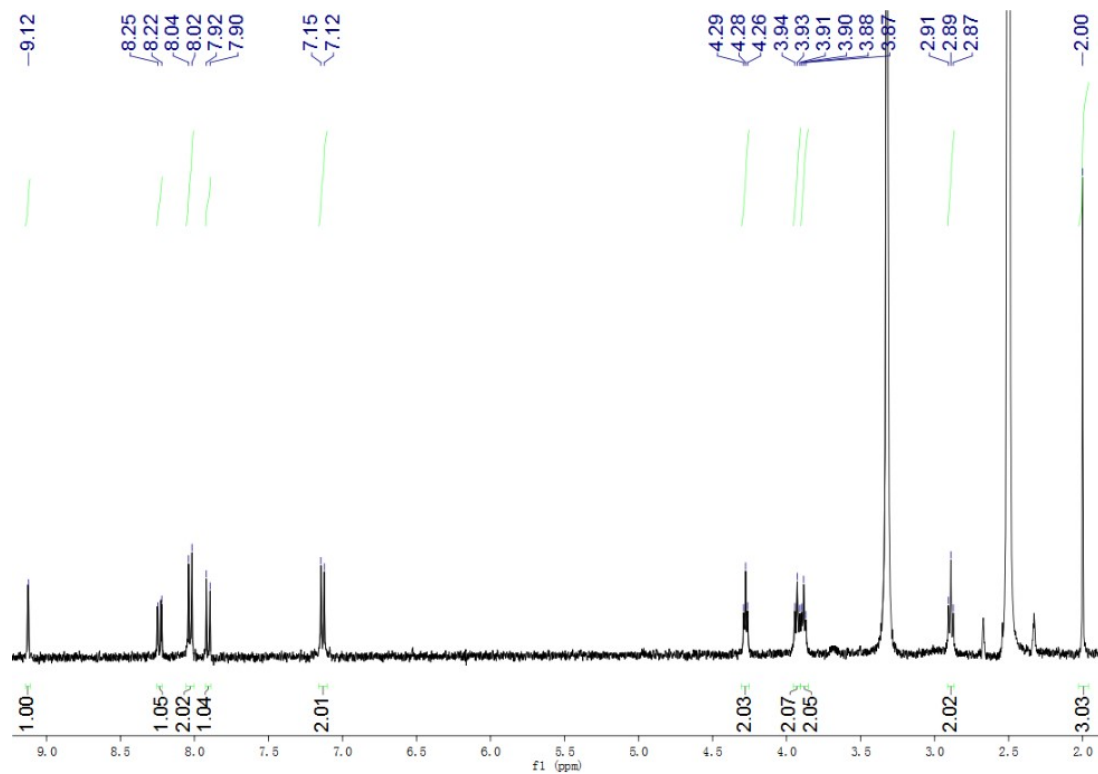Fig. S4. <sup>1</sup>H-NMR spectrum of D3

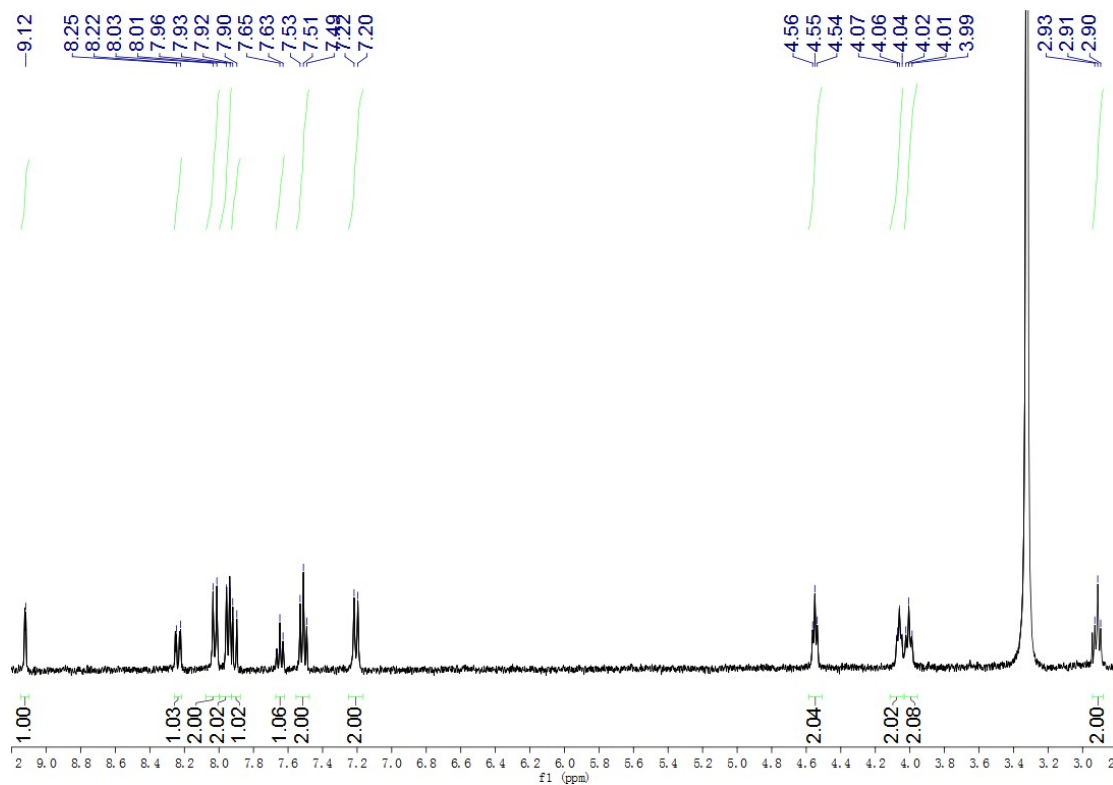Fig. S5. <sup>1</sup>H-NMR spectrum of D4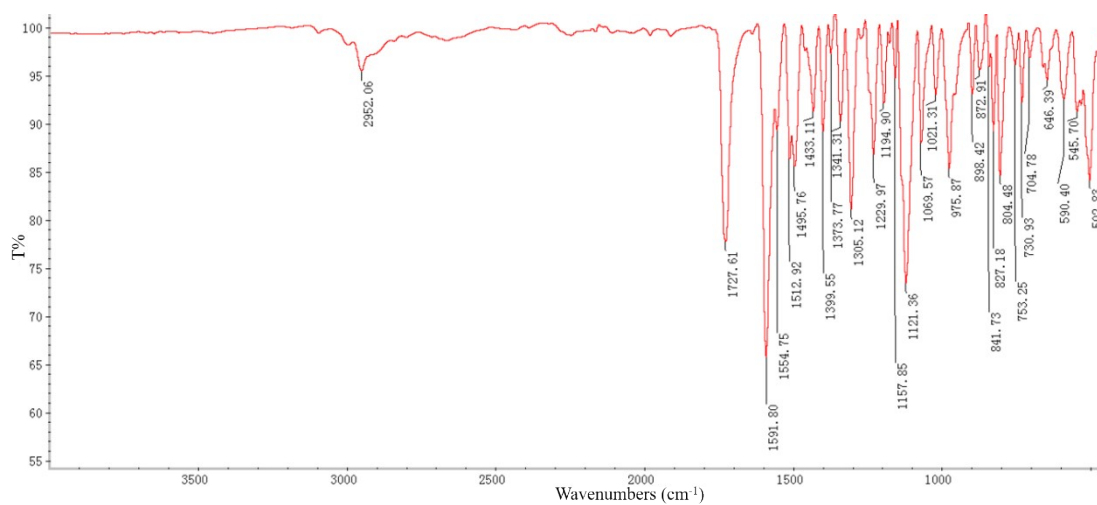

Fig. S6. FTIR spectrum of D1

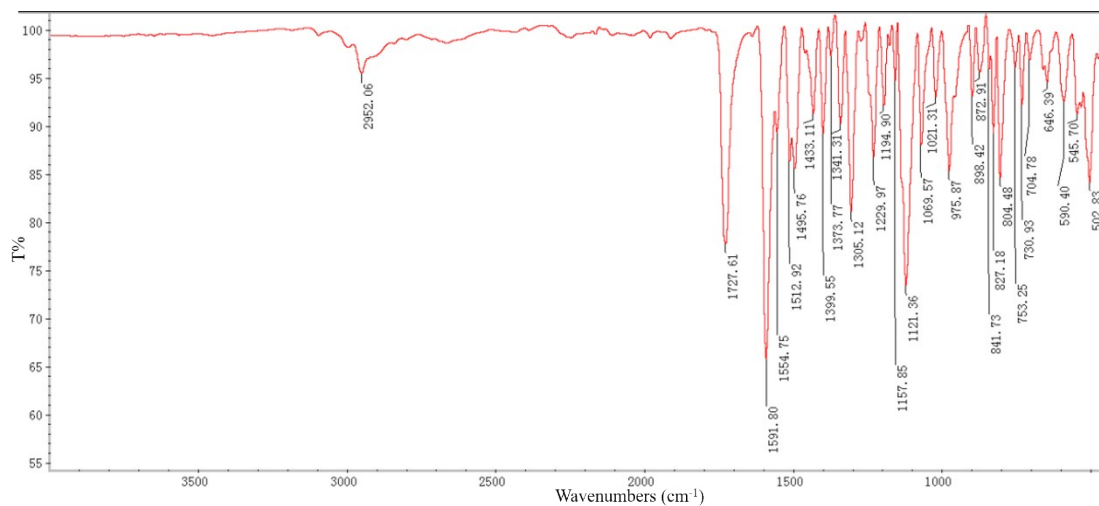

**Fig. S7. FTIR spectrum of D2**

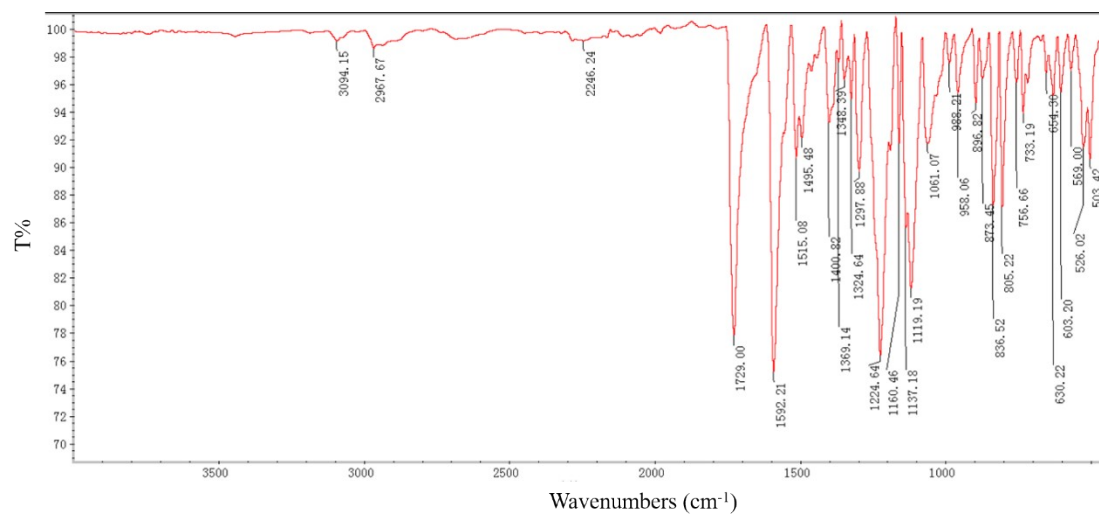

**Fig. S8. FTIR spectrum of D3**

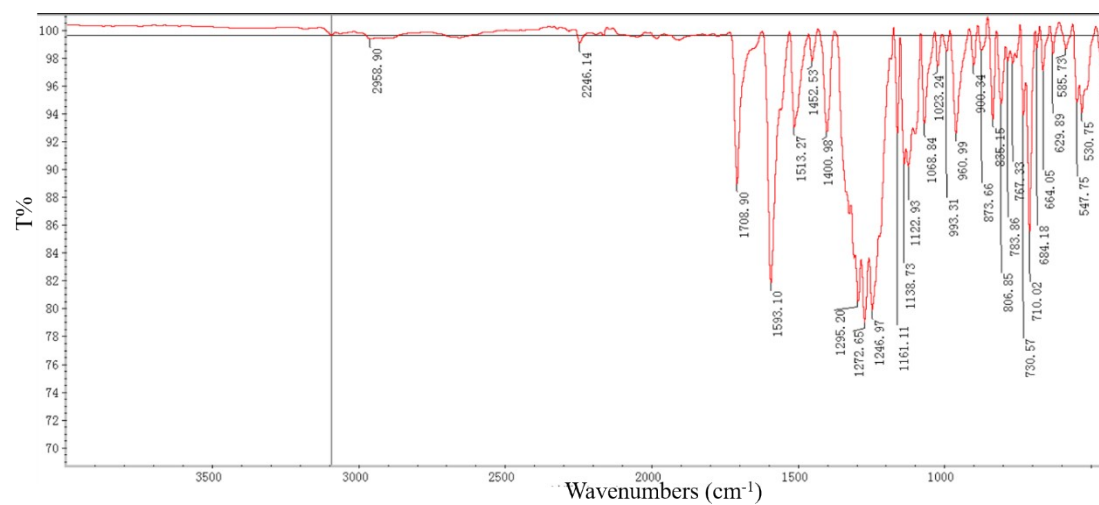

**Fig. S9. FTIR spectrum of D4**

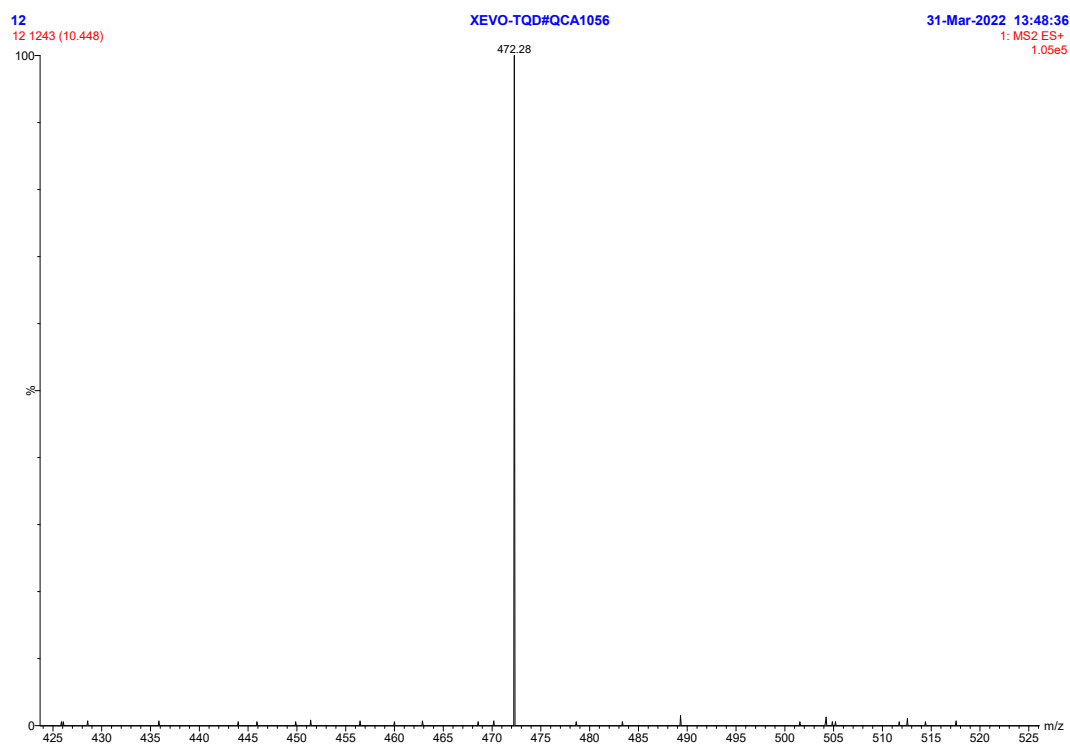

Fig. S10. MS spectrum of D1

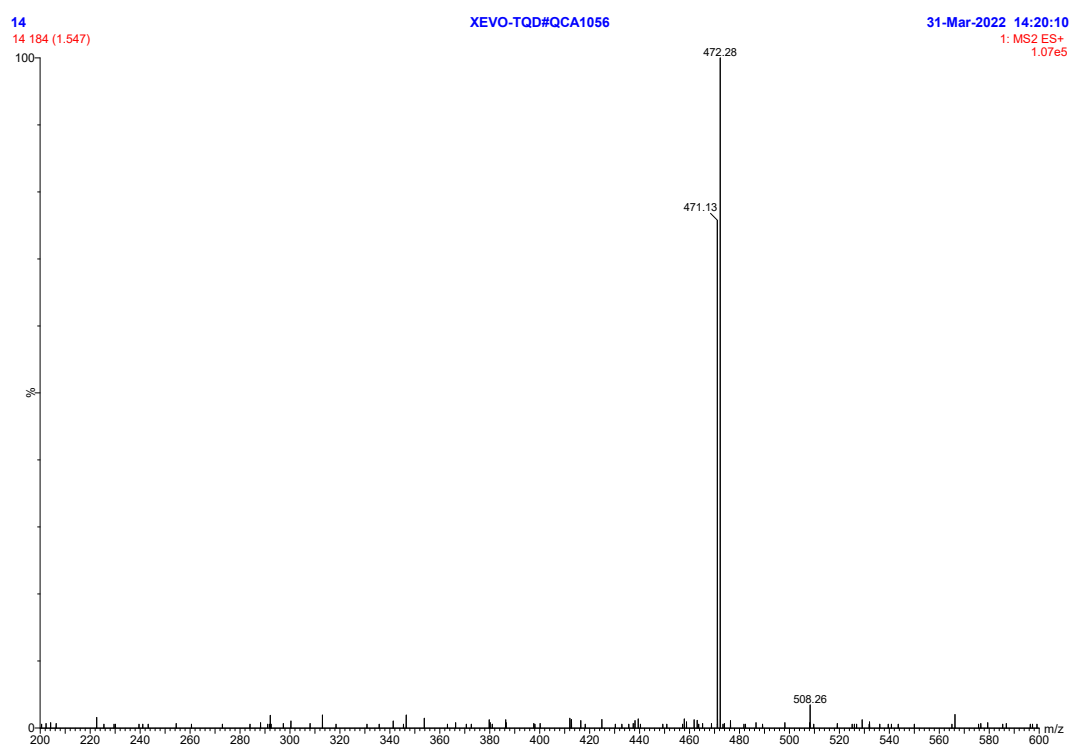

Fig. S11. MS spectrum of D2

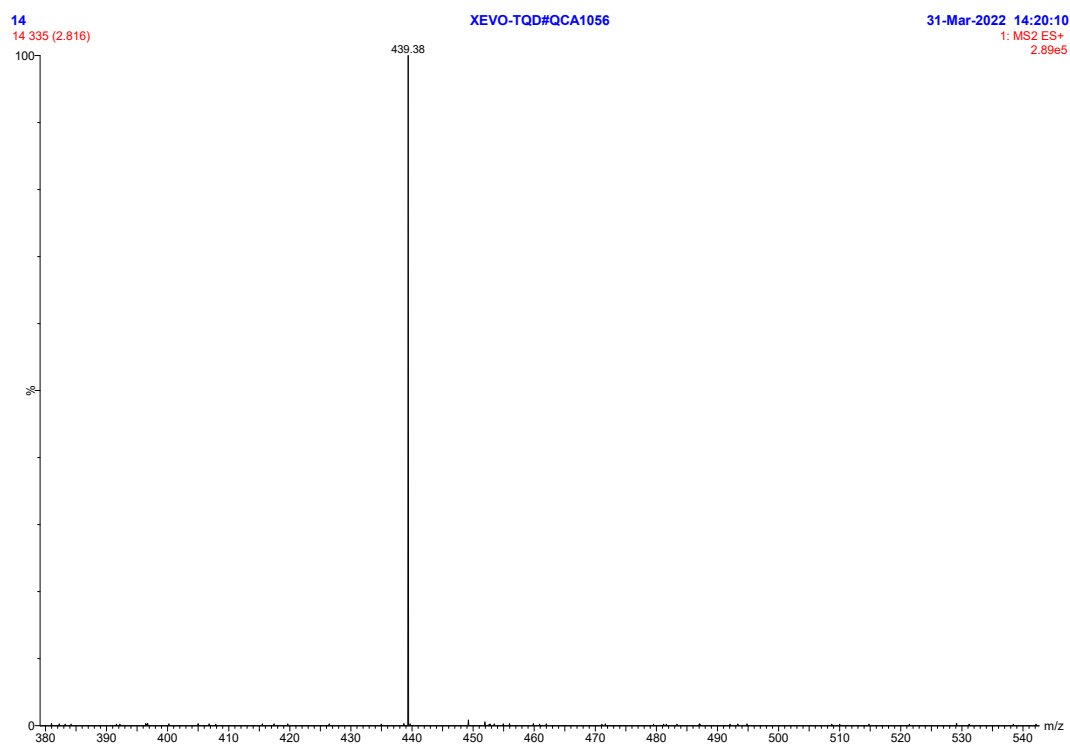

Fig. S12. MS spectrum of D3

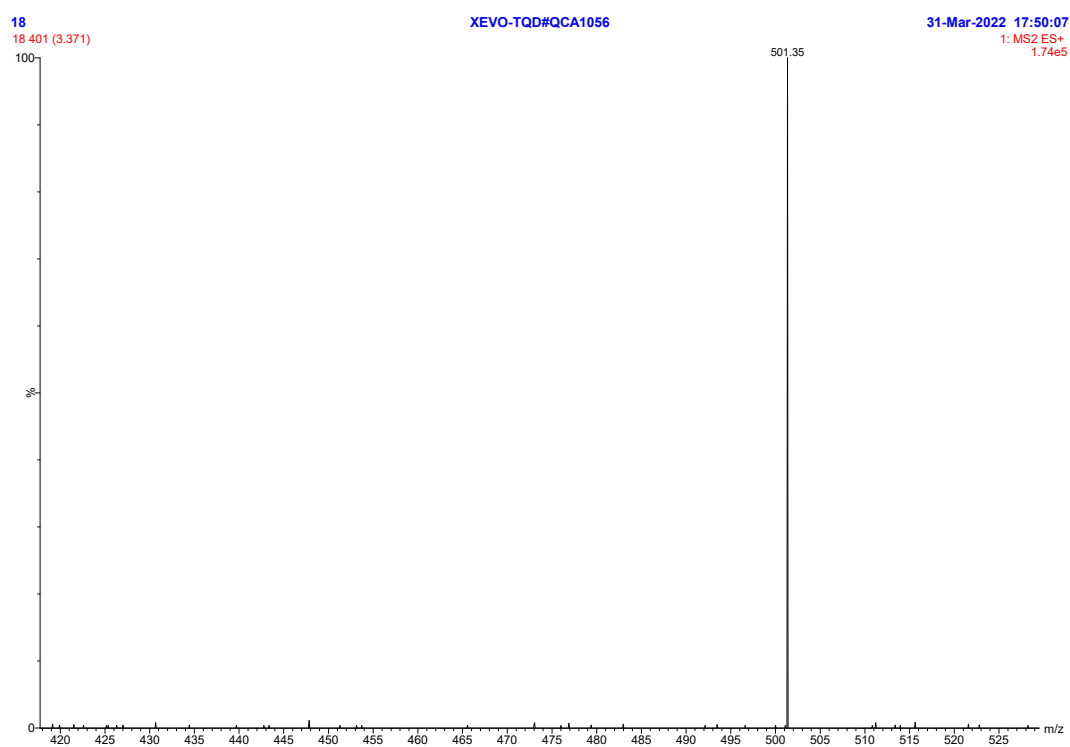

Fig. S13. MS spectrum of D4

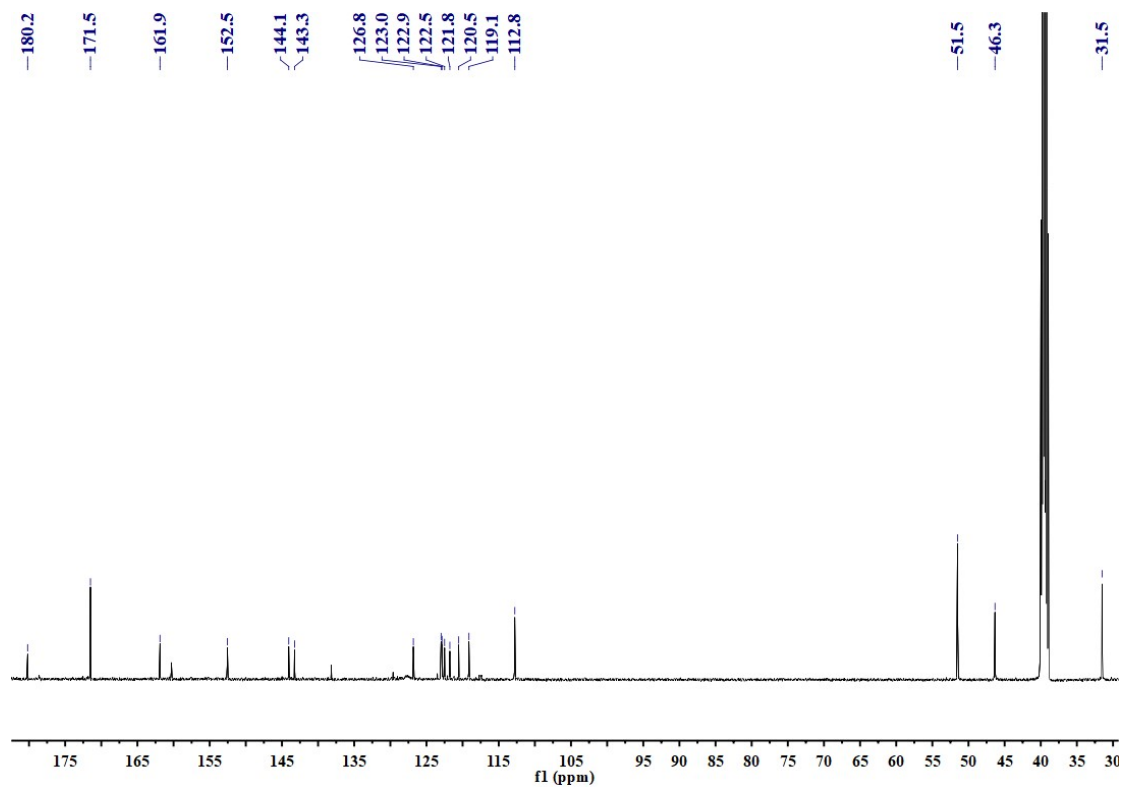Fig. S14. <sup>13</sup>C-NMR spectrum of D1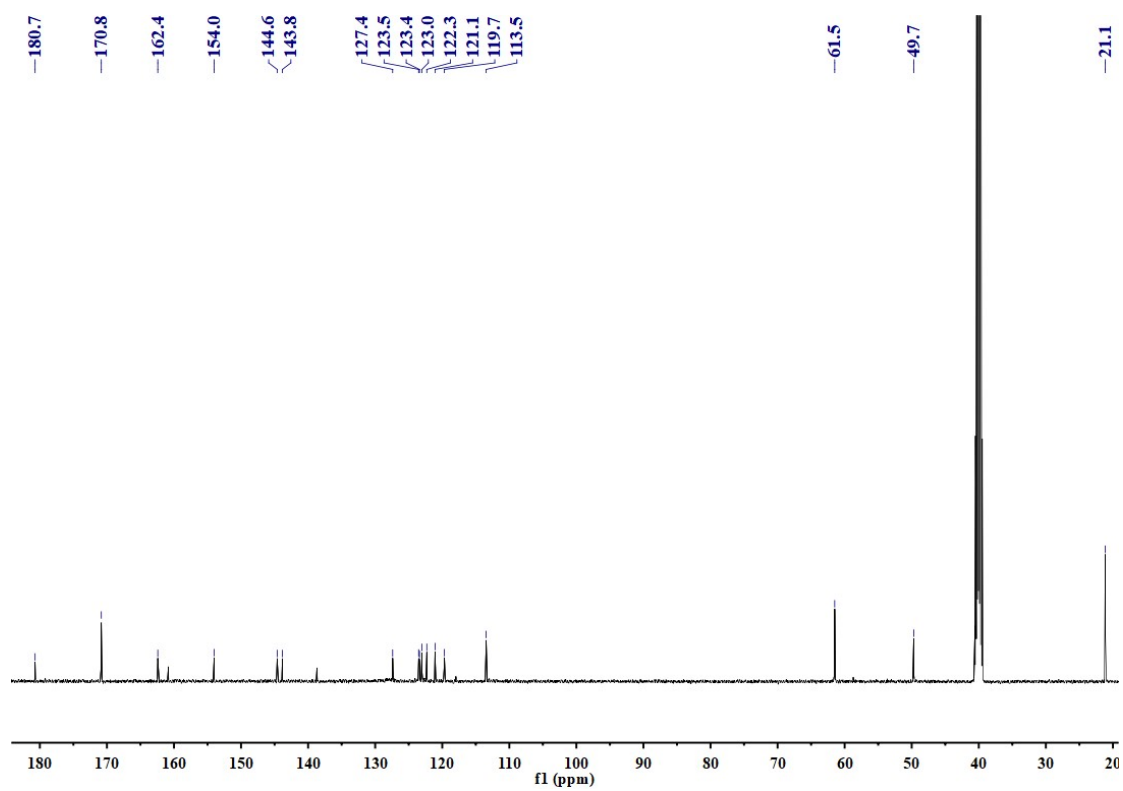Fig. S15. <sup>13</sup>C-NMR spectrum of D2



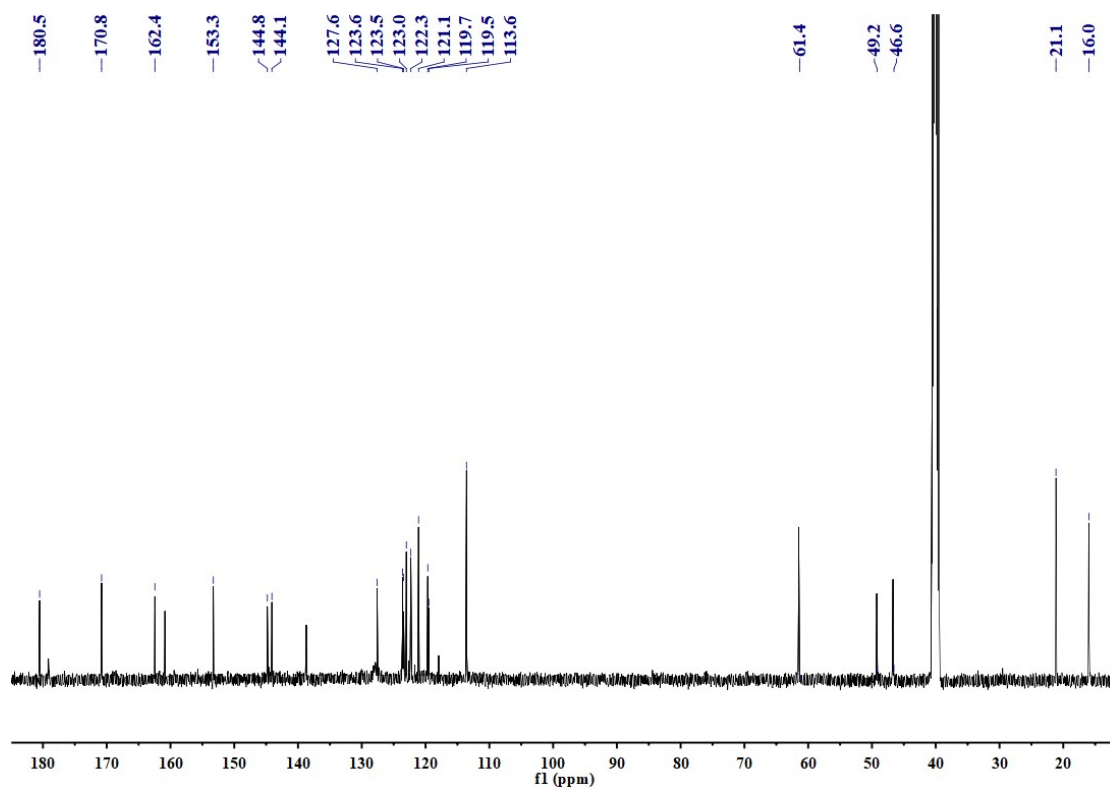Fig. S16.  $^{13}\text{C}$ -NMR spectrum of D3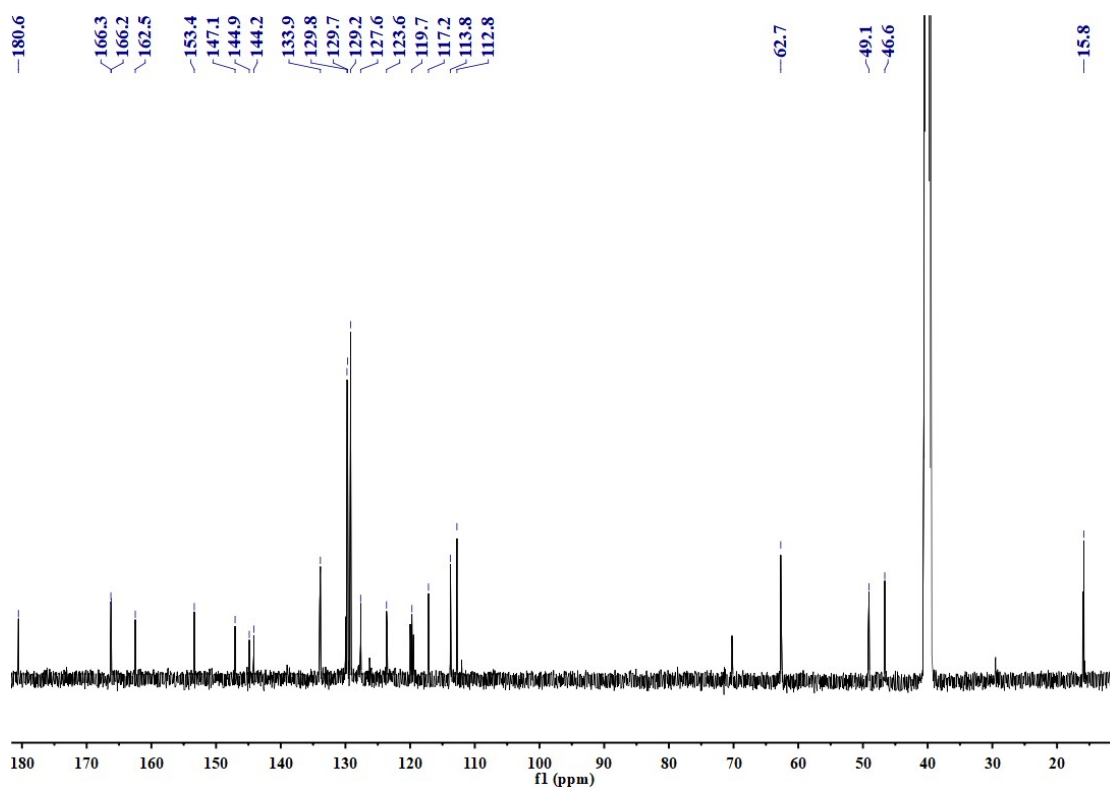Fig. S17.  $^{13}\text{C}$ -NMR spectrum of D4
